- A-274** Room E, 10/16/2000 9:00 AM - 11:00 AM (PS)  
**Perfusion-MRI & Cerebral Blood Flow Changes after CABG**  
*Thomas F. Floyd, MD; Michael A. Acker, MD; Timothy J. Gardiner, MD; Bruce R. Rosengard, MD; John A. Detre, MD, Anesthesia, Univ. of Pennsylvania, Philadelphia, PA, United States.* Perfusion-MRI generated brain perfusion maps before and 1 week after CABG. Global CBF increased by 70% ( $p < .05$ ) after CABG and correlated ( $r = .93$ ) with fall in hematocrit.
- A-275** Room E, 10/16/2000 9:00 AM - 11:00 AM (PS)  
**Contribution of Transcranial Doppler Sonography in the Management of Subacute Post-Subarachnoid Hemorrhage Hydrocephalus**  
*Thierry S. Gillart, MD; Jean E. Bazin, MD, PhD; Jean J. Lemaire, MD, PhD; Dominique Guelon, MD; Pierre Schoeffler, MD, Department of Anesthesia, CHRU, Clermont-Ferrand, France.* Transcranial Doppler Sonography evaluates CSF pressure and improves lumbar puncture rhythm
- A-276** Room E, 10/16/2000 9:00 AM - 11:00 AM (PS)  
**Validation of a New Multiparameter Sensor Measuring Brain Tissue Oxygenation Using Positron Emission Tomography**  
*Arun K. Gupta, MBBS FRCA; Peter J. Hutchinson; Tim Fryer; Wolfson Brain Imaging Team, PhD FRCA; David K. Menon, Anaesthesia and NeuroCritical Care, Addenbrooke's Hospital, Cambridge, England, United Kingdom.* Changes in  $PbO_2$  correlate with changes in  $PvO_2$ .
- A-277** Room E, 10/16/2000 9:00 AM - 11:00 AM (PS)  
**Spinal Cord Monitoring during Thoracic Neurosurgical Procedures**  
*H. Kim, MD; D.C. Adams, MD; D.J. Weisz, PhD; B.Y. Yang, PhD; N.I. Perin, MD, Anesthesiology and Neurosurgery, The Mt. Sinai Medical Center, New York, NY, United States.* This study demonstrates the feasibility of motor and sensory monitoring during thoracic spine procedures. Intraoperative conditions were optimized by controlled neuromuscular blockade.
- A-278** Room E, 10/16/2000 9:00 AM - 11:00 AM (PS)  
**Effect of Remifentanyl on Hemodynamics and Seizure Duration during Electroconvulsive Therapy (ECT)**  
*Anthony L. Kovac, MD; Thomas Hall, MD, Anesthesiology & Psychiatry, University of Kansas Medical Center, Kansas City, KS, United States.* The addition of remifentanyl to decreasing doses of methohexital allowed for an increase in seizure duration but no resulting change in hemodynamics.
- A-279** Room E, 10/16/2000 9:00 AM - 11:00 AM (PS)  
**Is There an Anesthetic Dependent Difference in Brain Blood Flow and Electroencephalography in Patients with Intracranial Vascular Pathology?**  
*Kathryn K. Lauer, M.D.; William S. Schmeling, M.D. PhD.; Tom Davis, Anesthesiology, Medical College of Wisconsin, Milwaukee, WI, United States.* This study compares VMCA and EEG between 3 inhalation agents in patients with intracranial vascular pathology.
- A-280** Room E, 10/16/2000 9:00 AM - 11:00 AM (PS)  
**The Efficacy of Electroencephalography and Somatosensory Evoked Potential Monitoring in Detecting Cerebral Ischemia during Carotid Endarterectomy under Regional Anesthesia**  
*Jeong-Gill Leem, M.D.; Yoon Choi, M.D.; Jung-Rak Lee, M.D.; Dong-Myung Lee, M.D., Department of Anesthesiology, Asan Medical Center, Songpa-gu, Seoul, Korea.* Carotid surgery, monitoring cerebral ischemia.
- A-281** Room E, 10/16/2000 9:00 AM - 11:00 AM (PS)  
**The Impact of Mobile Intraoperative MRI on Anesthetic Care**  
*Robert A. MacTaggart-Cowan, MD; Richard Falkenstein, MD; David P. Archer, MD; Carla J. Wallace, MD; Garnette R. Sutherland, MD, University of Calgary, Calgary, AB, Canada.* The use of mobile high-field intraoperative MRI increases the duration of craniotomies by 88 minutes, without any effect on the rate of recovery from anesthesia.
- A-282** Room E, 10/16/2000 9:00 AM - 11:00 AM (PS)  
**Does Pyridostigmine Bromide (PB) Have Central Effects?**  
*O. Nabtom-Shtick, MD; A. Gigi, MSc; B. Bruk, MSc; E. Gosben, MD; I. Probovnik, PhD, Chaim Sheba Medical Center, Tel-Hashomer, Israel.* A prospective preliminary study to explore possible central effect of PB. Mean velocity by TCD increased and results in Digit and Symbol test improved after repeated PB intake. Further study is needed.
- A-283** Room E, 10/16/2000 9:00 AM - 11:00 AM (PS)  
**Transcranial Doppler Sonography and Cerebrovascular CO<sub>2</sub>-Reactivity during Whole Body Hyperthermia**  
*A. Nierhaus, MD; C. Meissner; S. Hegewisch, MD; A. Meyer; J. Schulte am Esch, MD, Anesthesiology, University Hospital Eppendorf, Hamburg, Germany.* Cerebral blood flow velocity increased profoundly. CO<sub>2</sub>-reactivity was preserved. Hyperventilation only slightly decreased  $V_m$  during WBH.
- A-284** Room E, 10/16/2000 9:00 AM - 11:00 AM (PS)  
**Remifentanyl Facilitates Control of Bispectral Index by Sevoflurane**  
*Erik Olofsen, MSc; Michael Frank, MD; Albert Daban, MD PhD, Department of Anesthesiology, Leiden University Medical Center, Leiden, Netherlands.* Remifentanyl decreases sevoflurane concentration-bispectral index equilibration half-time and variability in BIS. This indicates the possibility of faster and more stable control of BIS.
- A-285** Room E, 10/16/2000 9:00 AM - 11:00 AM (PS)  
**Comparison of the Concentration-Dependent Effect of Sevoflurane on the Spinal H-Reflex and the EEG in Humans**  
*Benno Reberg, MD; Reinhard Rueschner, MD; Joerg Schneider; Andreas Hoeft, MD, PhD, Dept. of Anesthesia, Univ. of Bonn, Bonn, Germany.* Different  $t_{1/2k_{e0}}$ -values for H-Reflex and EEG point to distinct interactions on spinal and cerebral levels.
- A-286** Room E, 10/16/2000 9:00 AM - 11:00 AM (PS)  
**Somatosensory Evoked Potentials Vs Stump Pressure Correlations with Induced Hypotension during Temporary Endovascular Carotid Clamping**  
*Musa Sesay, MD; Pierre Arne, MD; Jerome Berge, MD; Pierre Maurette, MD, DAR3, Pellegrin, Bordeaux, France.* Somatosensory potentials are more accurate than stump pressure in assessing collateral reserve during endovascular carotid clamping.
- A-287** Room E, 10/16/2000 9:00 AM - 11:00 AM (PS)  
**Anesthetic Considerations for H-reflex Monitoring during Surgical Treatment of Spastic Disorders**  
*Velislav Slavov, MD; Jean-Pascal Lefaucheur, MD; Philippe Decq, MD; Paul Filipetti, MD; Philippe Duvaldestin, MD, Dept of Anesthesiology, Henri Mondor University Hospital, Creteil, France*
